# Supplementary material for: Complexity and algorithms for copy-number evolution problems
Source: PubMed Central journal article supplement (PMC5433102; doi:10.1186/s13015-017-0103-2), 2017-05-16
Supplement: 13015_2017_103_MOESM1_ESM.pdf [file 13015_2017_103_MOESM1_ESM.pdf]

# Complexity and Algorithms for Copy-Number Evolution Problems

Mohammed El-Kebir<sup>1,2</sup>, Benjamin J Raphael<sup>1,2\*</sup>, Ron Shamir<sup>\*3</sup>, Roded Sharan<sup>3</sup>, Simone Zaccaria<sup>1,2,4</sup>, Meirav Zehavi<sup>3</sup> and Ron Zeira<sup>3</sup>

\*Correspondence:

braphael@cs.princeton.edu;  
rshamir@post.tau.ac.il

<sup>1</sup>Department of Computer  
Science, Princeton University,  
Princeton, NJ 08540, USA

Full list of author information is  
available at the end of the article

## Appendix A: Omitted Proofs

(Main Text) **Lemma 5** Let  $\mathbf{u}$  and  $\mathbf{v}$  be two profiles. Then, there exists an optimal triple  $(\mathbf{m}, \sigma(\mathbf{m}, \mathbf{u}), \sigma(\mathbf{m}, \mathbf{v}))$  such that the following conditions hold.

- Both  $\sigma(\mathbf{m}, \mathbf{u})$  and  $\sigma(\mathbf{m}, \mathbf{v})$  are sorted sequences of events.
- For all  $1 \leq i \leq n$ ,  $m_i \leq B$ . Thus, for all  $1 \leq i \leq n$ ,  $m_i \leq \min\{B, e\}$ .
- For all  $1 \leq i \leq n$ ,  $\mathbf{c} \in \{\mathbf{u}, \mathbf{v}\}$  and  $w \in \{-, +\}$ ,  $co(\sigma(\mathbf{c}), w, i) \leq B$ .

*Proof* First, observe that in the formulas given in (Main Text) Lemma 3, one only examines parameters  $a$  and  $d$  of value at most  $B$ . Thus, by (Main Text) Lemmas 2 and 3, if there exists an optimal triple  $(\mathbf{m}, \sigma'(\mathbf{m}, \mathbf{u}), \sigma'(\mathbf{m}, \mathbf{v}))$  such that for all  $1 \leq i \leq n$ ,  $m_i \leq B$ , then there also exists an optimal triple  $(\mathbf{m}, \sigma(\mathbf{m}, \mathbf{u}), \sigma(\mathbf{m}, \mathbf{v}))$  such that  $\sigma(\mathbf{m}, \mathbf{u})$  and  $\sigma(\mathbf{m}, \mathbf{v})$  are sorted, and for all  $1 \leq i \leq n$ ,  $\mathbf{c} \in \{\mathbf{u}, \mathbf{v}\}$  and  $w \in \{-, +\}$ ,  $co(\sigma(\mathbf{m}, \mathbf{c}), w, i) \leq B$ . Thus, it is sufficient to show that there exists an optimal triple  $(\mathbf{m}, \sigma(\mathbf{m}, \mathbf{u}), \sigma(\mathbf{m}, \mathbf{v}))$  such that for all  $1 \leq i \leq n$ ,  $m_i \leq B$ .

Let  $(\mathbf{m}, \sigma(\mathbf{m}, \mathbf{u}), \sigma(\mathbf{m}, \mathbf{v}))$  be an optimal triple where  $\sigma(\mathbf{m}, \mathbf{u})$  and  $\sigma(\mathbf{m}, \mathbf{v})$  are sorted, which among all such triples minimizes  $\sum_{i=1}^n m_i$ . By (Main Text) Lemma 2, there exists such a triple, and therefore  $(\mathbf{m}, \sigma(\mathbf{m}, \mathbf{u}), \sigma(\mathbf{m}, \mathbf{v}))$  is well-defined. We will show that our choice of  $(\mathbf{m}, \sigma(\mathbf{m}, \mathbf{u}), \sigma(\mathbf{m}, \mathbf{v}))$  necessarily implies that for all  $1 \leq i \leq n$ ,  $m_i \leq B$ . Suppose, by way of contradiction, that this is not true. Now, let  $1 \leq i \leq n$  be an index such that  $m_i > B$ . Then,  $\sigma(\mathbf{m}, \mathbf{u})$  contains at least one deletion,  $c^{\mathbf{u}} = (\ell^{\mathbf{u}}, h^{\mathbf{u}}, -1)$ , such that  $\ell^{\mathbf{u}} \leq i \leq h^{\mathbf{u}}$ , and also  $\sigma(\mathbf{m}, \mathbf{v})$  contains at least one deletion,  $c^{\mathbf{v}} = (\ell^{\mathbf{v}}, h^{\mathbf{v}}, -1)$ , such that  $\ell^{\mathbf{v}} \leq i \leq h^{\mathbf{v}}$ . Consider the following cases.

- 1  $\ell^{\mathbf{u}} \leq \ell^{\mathbf{v}} \leq h^{\mathbf{u}} \leq h^{\mathbf{v}}$ : Let  $\mathbf{m}'$  be the profile obtained from  $\mathbf{m}$  by decrementing by 1 the value of each entry between  $\ell^{\mathbf{v}}$  and  $h^{\mathbf{u}}$ . That is,  $\mathbf{m}' = (m_1, \dots, m_{\ell^{\mathbf{v}}-1}, m_{\ell^{\mathbf{v}}} - 1, \dots, m_{h^{\mathbf{u}}} - 1, m_{h^{\mathbf{u}}+1}, \dots, m_n)$ . Now, in  $\sigma(\mathbf{m}, \mathbf{u})$  replace  $c^{\mathbf{u}}$  by the event  $(\ell^{\mathbf{u}}, \ell^{\mathbf{v}} - 1, -1)$ , while in  $\sigma(\mathbf{m}, \mathbf{v})$  replace  $c^{\mathbf{v}}$  by the event  $(h^{\mathbf{u}} + 1, h^{\mathbf{v}}, -1)$ . Let  $\sigma'(\mathbf{m}', \mathbf{u})$  and  $\sigma'(\mathbf{m}', \mathbf{v})$  denote the resulting sequences of events.

Since  $\sigma(\mathbf{m}, \mathbf{u})$  and  $\sigma(\mathbf{m}, \mathbf{v})$  are sorted, so do  $\sigma'(\mathbf{m}', \mathbf{u})$  and  $\sigma'(\mathbf{m}', \mathbf{v})$ . Moreover, since  $\sigma(\mathbf{m}, \mathbf{u})$  and  $\sigma'(\mathbf{m}', \mathbf{u})$  are sorted, for all  $1 \leq j \leq n$ , the value of the  $j^{\text{th}}$  entry of the profile yielded by  $\sigma(\mathbf{m}, \mathbf{u})$  from  $\mathbf{m}$  is 0 if  $m_j - co(\sigma(\mathbf{m}, \mathbf{u}), -, j) \leq 0$  and  $m_j - co(\sigma(\mathbf{m}, \mathbf{u}), -, j) + co(\sigma(\mathbf{m}, \mathbf{u}), +, j)$  otherwise, while the value of the  $j^{\text{th}}$  entry of the profile yielded by  $\sigma'(\mathbf{m}', \mathbf{u})$  from  $\mathbf{m}'$  is 0 if  $m'_j - co(\sigma'(\mathbf{m}', \mathbf{u}), -, j) \leq 0$  and  $m'_j - co(\sigma'(\mathbf{m}', \mathbf{u}), -, j)$ ,

$j) + co(\sigma'(\mathbf{m}', \mathbf{u}), +, j)$  otherwise. Because  $\sigma(\mathbf{m}, \mathbf{u})$  yields  $\mathbf{u}$  from  $\mathbf{m}$ , we have that  $u_j = 0$  if  $m_j - co(\sigma(\mathbf{m}, \mathbf{u}), -, j) \leq 0$ , and  $u_j = m_j - co(\sigma(\mathbf{m}, \mathbf{u}), -, j) + co(\sigma(\mathbf{m}, \mathbf{u}), +, j)$  otherwise. By our definition of  $\mathbf{m}'$  and  $\sigma'(\mathbf{m}', \mathbf{u})$ , if  $\ell^{\mathbf{v}} \leq j \leq h^{\mathbf{u}}$  then  $m'_j = m_j - 1$ ,  $co(\sigma'(\mathbf{m}', \mathbf{u}), -, j) = co(\sigma(\mathbf{m}, \mathbf{u}), -, j) - 1$  and  $co(\sigma'(\mathbf{m}', \mathbf{u}), +, j) = co(\sigma(\mathbf{m}, \mathbf{u}), +, j)$ , and otherwise  $m'_j = m_j$ ,  $co(\sigma'(\mathbf{m}', \mathbf{u}), -, j) = co(\sigma(\mathbf{m}, \mathbf{u}), -, j)$  and  $co(\sigma'(\mathbf{m}', \mathbf{u}), +, j) = co(\sigma(\mathbf{m}, \mathbf{u}), +, j)$ . Therefore, if  $m'_j - co(\sigma'(\mathbf{m}', \mathbf{u}), -, j) \leq 0$  then  $u_j = 0$ , and  $u_j = m'_j - co(\sigma'(\mathbf{m}', \mathbf{u}), -, j) + co(\sigma'(\mathbf{m}', \mathbf{u}), +, j)$  otherwise. Since the choice of  $j$  was arbitrary, we have that  $\sigma'(\mathbf{m}', \mathbf{u})$  yields  $\mathbf{u}$  from  $\mathbf{m}'$ . Symmetrically, we have that  $\sigma'(\mathbf{m}', \mathbf{v})$  yields  $\mathbf{v}$  from  $\mathbf{m}'$ . We thus conclude that  $(\mathbf{m}', \sigma(\mathbf{m}, \mathbf{u}), \sigma'(\mathbf{m}', \mathbf{v}))$  is an optimal triple. However,  $\sum_{i=1}^n m'_i < \sum_{i=1}^n m_i$ , which contradicts the choice of  $\mathbf{m}$ .

- 2  $\ell^{\mathbf{v}} \leq \ell^{\mathbf{u}} \leq h^{\mathbf{v}} \leq h^{\mathbf{u}}$ : This case is symmetric to the previous one, and therefore also leads to a contradiction.
- 3  $\ell^{\mathbf{u}} \leq \ell^{\mathbf{v}} \leq h^{\mathbf{v}} \leq h^{\mathbf{u}}$ : Let  $\mathbf{m}'$  be the CNP obtained from  $\mathbf{m}$  by decrementing by 1 the value of each entry between  $\ell^{\mathbf{v}}$  and  $h^{\mathbf{v}}$ . That is,  $\mathbf{m}' = (m_1, \dots, m_{\ell^{\mathbf{v}}-1}, m_{\ell^{\mathbf{v}}}-1, \dots, m_{h^{\mathbf{v}}}-1, m_{h^{\mathbf{v}}+1}, \dots, m_n)$ . Now, in  $\sigma(\mathbf{m}, \mathbf{u})$  replace  $c^{\mathbf{u}}$  by the events  $(\ell^{\mathbf{u}}, \ell^{\mathbf{v}} - 1, -1)$  and  $(h^{\mathbf{v}} + 1, h^{\mathbf{u}}, -1)$ , while in  $\sigma(\mathbf{m}, \mathbf{v})$  remove  $c^{\mathbf{v}}$ . Let  $\sigma'(\mathbf{m}', \mathbf{u})$  and  $\sigma'(\mathbf{m}', \mathbf{v})$  denote the resulting sequences of events. Since  $\sigma(\mathbf{m}, \mathbf{u})$  and  $\sigma(\mathbf{m}, \mathbf{v})$  are sorted, so do  $\sigma'(\mathbf{m}', \mathbf{u})$  and  $\sigma'(\mathbf{m}', \mathbf{v})$ . Moreover, since  $\sigma(\mathbf{m}, \mathbf{u})$  and  $\sigma'(\mathbf{m}', \mathbf{u})$  are sorted, for all  $1 \leq j \leq n$ , the value of the  $j^{\text{st}}$  entry of the profile yielded by  $\sigma(\mathbf{m}, \mathbf{u})$  from  $\mathbf{m}$  is 0 if  $m_j - co(\sigma(\mathbf{m}, \mathbf{u}), -, j) \leq 0$  and  $m_j - co(\sigma(\mathbf{m}, \mathbf{u}), -, j) + co(\sigma(\mathbf{m}, \mathbf{u}), +, j)$  otherwise, while the value of the  $j^{\text{st}}$  entry of the profile yielded by  $\sigma'(\mathbf{m}', \mathbf{u})$  from  $\mathbf{m}'$  is 0 if  $m'_j - co(\sigma'(\mathbf{m}', \mathbf{u}), -, j) \leq 0$  and  $m'_j - co(\sigma'(\mathbf{m}', \mathbf{u}), -, j) + co(\sigma'(\mathbf{m}', \mathbf{u}), +, j)$  otherwise. Because  $\sigma(\mathbf{m}, \mathbf{u})$  yields  $\mathbf{u}$  from  $\mathbf{m}$ , we have that  $u_j = 0$  if  $m_j - co(\sigma(\mathbf{m}, \mathbf{u}), -, j) \leq 0$ , and  $u_j = m_j - co(\sigma(\mathbf{m}, \mathbf{u}), -, j) + co(\sigma(\mathbf{m}, \mathbf{u}), +, j)$  otherwise. By our definition of  $\mathbf{m}'$  and  $\sigma'(\mathbf{m}', \mathbf{u})$ , if  $\ell^{\mathbf{v}} \leq j \leq h^{\mathbf{v}}$  then  $m'_j = m_j - 1$ ,  $co(\sigma'(\mathbf{m}', \mathbf{u}), -, j) = co(\sigma(\mathbf{m}, \mathbf{u}), -, j) - 1$  and  $co(\sigma'(\mathbf{m}', \mathbf{u}), +, j) = co(\sigma(\mathbf{m}, \mathbf{u}), +, j)$ , and otherwise  $m'_j = m_j$ ,  $co(\sigma'(\mathbf{m}', \mathbf{u}), -, j) = co(\sigma(\mathbf{m}, \mathbf{u}), -, j)$  and  $co(\sigma'(\mathbf{m}', \mathbf{u}), +, j) = co(\sigma(\mathbf{m}, \mathbf{u}), +, j)$ . Therefore, if  $m'_j - co(\sigma'(\mathbf{m}', \mathbf{u}), -, j) \leq 0$  then  $u_j = 0$ , and  $u_j = m'_j - co(\sigma'(\mathbf{m}', \mathbf{u}), -, j) + co(\sigma'(\mathbf{m}', \mathbf{u}), +, j)$  otherwise. Since the choice of  $j$  was arbitrary, we have that  $\sigma'(\mathbf{m}', \mathbf{u})$  yields  $\mathbf{u}$  from  $\mathbf{m}'$ . Replacing  $\mathbf{u}$  and  $\mathbf{u}'$  by  $\mathbf{v}$  and  $\mathbf{v}'$ , respectively, in the arguments above shows also that  $\sigma(\mathbf{m}, \mathbf{v})'$  yields  $\mathbf{v}$  from  $\mathbf{m}'$ . We thus conclude that  $(\mathbf{m}', \sigma'(\mathbf{m}', \mathbf{u}), \sigma'(\mathbf{m}', \mathbf{v}))$  is an optimal triple. However,  $\sum_{i=1}^n m'_i < \sum_{i=1}^n m_i$ , which contradicts the choice of  $\mathbf{m}$ .
- 4  $\ell^{\mathbf{v}} \leq \ell^{\mathbf{u}} \leq h^{\mathbf{u}} \leq h^{\mathbf{v}}$ : This case is symmetric to the previous one, and therefore also leads to a contradiction.

Since the case analysis is exhaustive, and each case leads to a contradiction, we conclude that the lemma is correct.  $\square$

## Appendix B: Copy-Number Triplet Problem: ILP

In this section we give an ILP formulation for CN3 that consists of only  $O(n)$  variables and  $O(n)$  constraints. For every  $1 \leq i \leq n$  and  $\mathbf{w} \in \{\mathbf{u}, \mathbf{v}\}$ , we introduce the integer variables  $1 \leq m_i \leq \min\{B, e\}$  and  $0 \leq d_i^{\mathbf{w}}, a_i^{\mathbf{w}}, s_i^{\mathbf{w}}, t_i^{\mathbf{w}} \leq B$ . The  $m_i$  variables correspond to the copy numbers of the parent profile of  $\mathbf{u}$  and  $\mathbf{v}$ . The number

of deletions (resp. amplifications) transforming  $m_i$  to  $\mathbf{w}_i \in \{\mathbf{u}_i, \mathbf{v}_i\}$  is represented by the variables  $d_i^{\mathbf{w}}$  (resp.  $a_i^{\mathbf{w}}$ ). The variables  $s_i^{\mathbf{w}}$  (resp.  $t_i^{\mathbf{w}}$ ) capture the number of deletions (resp. amplifications) that start at position  $i$  in the sequence from  $m_i$  to  $\mathbf{w}_i \in \{\mathbf{u}_i, \mathbf{v}_i\}$ .

Here we have the restriction  $1 \leq m_i \leq B$  since by (Main Text) Lemma 5 we can assume that each position of the profile  $\mathbf{m}$  is upper-bounded by  $B$ , while by (Main Text) Lemma 1 we can assume it is lower-bounded by 1. For every  $\mathbf{w} \in \{\mathbf{u}, \mathbf{v}\}$ , denote  $a_0^{\mathbf{w}} = d_0^{\mathbf{w}} = 0$ .

For every  $1 \leq i \leq n$  and  $\mathbf{w} \in \{\mathbf{u}, \mathbf{v}\}$ , we have the following constraints:

$$m_i \leq d_i^{\mathbf{w}} \qquad w_i = 0 \qquad (1)$$

$$d_i^{\mathbf{w}} \leq m_i - 1 \qquad w_i > 0 \qquad (2)$$

$$m_i - d_i^{\mathbf{w}} + a_i^{\mathbf{w}} = w_i \qquad w_i > 0 \qquad (3)$$

$$s_i^{\mathbf{w}} \geq d_i^{\mathbf{w}} - d_{i-1}^{\mathbf{w}} \qquad (4)$$

$$t_i^{\mathbf{w}} \geq a_i^{\mathbf{w}} - a_{i-1}^{\mathbf{w}} \qquad (5)$$

Constraints 1, 2 and 3 ensure that the amplification/deletion variables represent a valid transformation of  $m$  into  $\mathbf{w}$ . Constraints 4 and 5 capture the additional cost of new deletions/amplifications starting at index  $i$ . That is,  $d_{i-1}^{\mathbf{w}}$  deletions (resp.  $a_{i-1}^{\mathbf{w}}$  amplifications) can be extended to position  $i$  at no additional cost.

The objective function is:

$$F(\mathbf{u}, \mathbf{v}) = \min_{\mathbf{w} \in \{\mathbf{u}, \mathbf{v}\}} \sum_{i=1}^n (s_i^{\mathbf{w}} + t_i^{\mathbf{w}}) \qquad (6)$$

**Lemma 10** For two profiles  $\mathbf{u}$  and  $\mathbf{v}$ ,  $F(\mathbf{u}, \mathbf{v}) = \Delta(\mathbf{u}, \mathbf{v})$ .

*Proof* On the one hand, let  $(\hat{\mathbf{m}}, \sigma(\hat{\mathbf{m}}, \mathbf{u}), \sigma(\hat{\mathbf{m}}, \mathbf{v}))$  be an optimal triple. We assign values to the ILP variables as follows. First, for every  $1 \leq i \leq n$ , let  $m_i = \hat{m}_i$ . Now, for every  $1 \leq i \leq n$  and  $\mathbf{w} \in \{\mathbf{u}, \mathbf{v}\}$ , let  $d_i^{\mathbf{w}} = \text{co}(\sigma(\hat{\mathbf{m}}, \mathbf{w}), -, i)$ ,  $a_i^{\mathbf{w}} = \text{co}(\sigma(\hat{\mathbf{m}}, \mathbf{w}), +, i)$ ,  $s_i^{\mathbf{w}} = \max\{\text{co}(\sigma(\hat{\mathbf{m}}, \mathbf{w}), -, i) - \text{co}(\sigma(\hat{\mathbf{m}}, \mathbf{w}), -, i-1), 0\}$  and  $t_i^{\mathbf{w}} = \max\{\text{co}(\sigma(\hat{\mathbf{m}}, \mathbf{w}), +, i) - \text{co}(\sigma(\hat{\mathbf{m}}, \mathbf{w}), +, i-1), 0\}$ .

Since  $(\hat{\mathbf{m}}, \sigma(\hat{\mathbf{m}}, \mathbf{u}), \sigma(\hat{\mathbf{m}}, \mathbf{v}))$  is an optimal triple, we have that for every  $1 \leq i \leq n$  and  $\mathbf{w} \in \{\mathbf{u}, \mathbf{v}\}$ , if  $w_i = 0$  then  $\hat{m}_i \leq \text{co}(\sigma(\hat{\mathbf{m}}, \mathbf{w}), -, i)$ , and if  $w_i > 0$  then  $\text{co}(\sigma(\hat{\mathbf{m}}, \mathbf{w}), -, i) \leq \hat{m}_i - 1$  and  $\hat{m}_i - \text{co}(\sigma(\hat{\mathbf{m}}, \mathbf{w}), -, i) + \text{co}(\sigma(\hat{\mathbf{m}}, \mathbf{w}), +, i) = w_i$ . Thus, by our assignment, all of the constraints are satisfied.

We now claim that under our assignment, for all  $\mathbf{w} \in \{\mathbf{u}, \mathbf{v}\}$ ,  $\delta_{\sigma}(\hat{\mathbf{m}}, \mathbf{w}) = \sum_{i=1}^n s_i^{\mathbf{w}} + t_i^{\mathbf{w}}$ , and therefore  $F(\mathbf{u}, \mathbf{v}) \leq \Delta(\mathbf{u}, \mathbf{v})$ . Indeed, by (Main Text) Lemma 3,  $\delta_{\sigma}(\hat{\mathbf{m}}, \mathbf{w}) = G[n, d_n^{\mathbf{w}}, a_n^{\mathbf{w}}] = G[n-1, d_{n-1}^{\mathbf{w}}, a_{n-1}^{\mathbf{w}}] + \max\{d_n^{\mathbf{w}} - d_{n-1}^{\mathbf{w}}, 0\} + \max\{a_n^{\mathbf{w}} - a_{n-1}^{\mathbf{w}}, 0\} = \dots = \sum_{i=1}^n (\max\{d_i^{\mathbf{w}} - d_{i-1}^{\mathbf{w}}, 0\} + \max\{a_i^{\mathbf{w}} - a_{i-1}^{\mathbf{w}}, 0\})$ .

On the other hand, let  $\mathbf{m}, \mathbf{d}, \mathbf{a}, \mathbf{s}, \mathbf{t}$  be a solution to the ILP. Without loss of generality, we assume that for every  $1 \leq i \leq n$  and  $\mathbf{w} \in \{\mathbf{u}, \mathbf{v}\}$ ,  $s_i^{\mathbf{w}} = \max\{d_i^{\mathbf{w}} - d_{i-1}^{\mathbf{w}}, 0\}$  and  $t_i^{\mathbf{w}} = \max\{a_i^{\mathbf{w}} - a_{i-1}^{\mathbf{w}}, 0\}$ . We construct a solution  $(\hat{\mathbf{m}}, \sigma(\hat{\mathbf{m}}, \mathbf{u}), \sigma(\hat{\mathbf{m}}, \mathbf{v}))$  to the input instance of CN3 as follows. For every  $1 \leq i \leq n$ , let  $\hat{m}_i = m_i$ . For

every  $\mathbf{w} \in \{\mathbf{u}, \mathbf{v}\}$ , to construct  $\sigma(\hat{\mathbf{m}}, \mathbf{w})$ , consider the following process. Start with  $\sigma(\hat{\mathbf{m}}, \mathbf{w}) = ()$  and an empty queue  $Q$ . For every  $1 \leq i \leq n$ , if  $s_i^{\mathbf{w}} > 0$  push the index  $i$  into  $Q$   $s_i^{\mathbf{w}}$  times. Conversely, if  $d_i^{\mathbf{w}} - d_{i-1}^{\mathbf{w}} < 0$ , pop  $d_{i-1}^{\mathbf{w}} - d_i^{\mathbf{w}}$  indices from  $Q$ , and for each popped index  $j$  append  $(j, i, -1)$  to  $\sigma(\hat{\mathbf{m}}, \mathbf{w})$ . For each index  $j$  remaining in  $Q$  in the end, append  $(j, n, -1)$  to  $\sigma(\hat{\mathbf{m}}, \mathbf{w})$ . Similarly, add amplifications to  $\sigma(\hat{\mathbf{m}}, \mathbf{w})$  using the  $t_i^{\mathbf{w}}$ 's and  $a_i^{\mathbf{w}}$ 's.

By our construction, the number of deletions (resp. amplifications) affecting each index  $i$  is exactly  $d_i^{\mathbf{w}}$  (resp.  $a_i^{\mathbf{w}}$ ), and by the first three constraints in the ILP formulation,  $\sigma(\hat{\mathbf{m}}, \mathbf{w})$  yields  $\mathbf{w}$  from  $\mathbf{m}$ . To conclude the proof, we show that  $\delta_\sigma(\hat{\mathbf{m}}, \mathbf{w}) = \sum_{i=1}^n s_i^{\mathbf{w}} + t_i^{\mathbf{w}}$ , and therefore  $\Delta(\mathbf{u}, \mathbf{v}) \leq F(\mathbf{u}, \mathbf{v})$ . Indeed, by our construction,  $s_i^{\mathbf{w}}$  deletions (resp.  $t_i^{\mathbf{w}}$  amplifications) are added to  $\sigma(\hat{\mathbf{m}}, \mathbf{w})$  for each  $i$  such that  $s_i^{\mathbf{w}} > 0$  (resp.  $t_i^{\mathbf{w}} > 0$ ).  $\square$

Next we show that not all variables must be explicitly restricted to be integers in our ILP formulation.

**Lemma 11** If the  $m_i$  variables are integers, then there is a solution where all variables are integers.

*Proof* Let  $\mathbf{m}, \mathbf{d}, \mathbf{a}, \mathbf{s}, \mathbf{t}$  be a solution to the ILP such that  $m_i$  is an integer for every  $1 \leq i \leq n$ . We consider the following rounding process for any profile  $\mathbf{w} \in \{\mathbf{u}, \mathbf{v}\}$  and for every  $i$  starting from  $i = n$  down to  $i = 1$ .

If  $w_i = 0$ , set  $a_i^{\mathbf{w}'} = \lfloor a_i^{\mathbf{w}} \rfloor$  and  $t_i^{\mathbf{w}} = \max\{a_i^{\mathbf{w}'} - a_{i-1}^{\mathbf{w}}, 0\}$ . Then, set  $d_i^{\mathbf{w}'} = \max\{\lfloor d_i^{\mathbf{w}} \rfloor, m_i\} \leq d_i^{\mathbf{w}}$  and  $s_i^{\mathbf{w}} = \max\{d_i^{\mathbf{w}'} - d_{i-1}^{\mathbf{w}}, 0\}$ . Both adjustments satisfy all the constraints and can only improve the objective function.

If  $w_i > 0$  then  $m_i - w_i = d_i^{\mathbf{w}} - a_i^{\mathbf{w}}$  is an integer and the remainder of  $d_i^{\mathbf{w}}, a_i^{\mathbf{w}}$  from an integer is the same. We round down  $d_i^{\mathbf{w}}, a_i^{\mathbf{w}}$  to the next smallest integer thus keeping the difference  $d_i^{\mathbf{w}} - a_i^{\mathbf{w}}$  and satisfying  $\lfloor d_i^{\mathbf{w}} \rfloor \leq m_i - 1$ . Next, we update  $s_i^{\mathbf{w}} = \max\{\lfloor d_i^{\mathbf{w}} \rfloor - d_{i-1}^{\mathbf{w}}, 0\}$  and  $t_i^{\mathbf{w}} = \max\{\lfloor a_i^{\mathbf{w}} \rfloor - a_{i-1}^{\mathbf{w}}, 0\}$ . Again, we have that all values are integers and the objective function can only be improved.  $\square$

From Lemma 11, we have that only the  $m_i$  variables must be restricted to be integers and all of the other variables can be relaxed. We note that in the majority of our simulation, a fully relaxed LP formulation gave an integral solution. Moreover, a gap between the ILP solution and the relaxed LP solution was seldom observed. We further hypothesize (according to our experiments) that the relaxed LP has an half-integral solution. We also note that our formulation can be naturally extended to handle more than two profiles. That is, given a set of profiles  $Y$ , we can find a ‘‘median’’ profile  $\mathbf{m}$ , i.e. profile  $\mathbf{m}$  that minimizes the sum of costs  $\sum_{\mathbf{y} \in Y} \delta_\sigma(\mathbf{m}, \mathbf{y})$ .

## Appendix C: Copy-Number Tree Problem: Complete ILP

The ILP formulation is reproduced in its entirety below. We define  $M = \lfloor \log_2(e) \rfloor + 1$ .

$$\begin{aligned}
\min \quad & \sum_{(v_i, v_j) \in E(G)} \sum_{1 \leq s \leq n} w_{i,j,s} \\
& \sum_{i \in N^-(j)} x_{i,j} = 1 && 1 < j \leq 2k - 1 \\
& \sum_{j \in N^+(i)} x_{i,j} = 2 && 1 \leq i < k \\
& y_{1,s} = 2 && 1 \leq s \leq n \\
& y_{i,s} = c_{i-k+1,s} && k \leq i \leq 2k - 1, 1 \leq s \leq n \\
& y_{i,s} = \sum_{q=0}^M 2^q \cdot z_{i,s,q} && 1 \leq i \leq 2k - 1, 1 \leq s \leq n \\
& \bar{y}_{i,s} \leq \sum_{q=0}^M z_{i,s,q} && 1 \leq i \leq 2k - 1, 1 \leq s \leq n \\
& \bar{y}_{i,s} \geq z_{i,s,q} && 1 \leq i \leq 2k - 1, 1 \leq s \leq n, 0 \leq q \leq M \\
& y_{j,s} \leq y_{i,s} - d_{i,j,s} + a_{i,j,s} + 2e(2 - \bar{y}_{i,s} - \bar{y}_{j,s}) && 1 \leq s \leq n, (v_i, v_j) \in E(G) \\
& y_{j,s} + 2e(2 - \bar{y}_{i,s} - \bar{y}_{j,s}) \geq y_{i,s} - d_{i,j,s} + a_{i,j,s} && 1 \leq s \leq n, (v_i, v_j) \in E(G) \\
& d_{i,j,s} \leq y_{i,s} - 1 + (e + 1)(2 - \bar{y}_{i,s} - \bar{y}_{j,s}) && 1 \leq s \leq n, (v_i, v_j) \in E(G) \\
& y_{i,s} \leq d_{i,j,s} + e(1 - \bar{y}_{i,s} + \bar{y}_{j,s}) && 1 \leq s \leq n, (v_i, v_j) \in E(G) \\
& (1 - x_{i,j}) + \bar{y}_{i,s} \geq \bar{y}_{j,s} && 1 \leq s \leq n, (v_i, v_j) \in E(G) \\
& \bar{a}_{i,j,s} \geq a_{i,j,s} - a_{i,j,s-1} && 1 \leq s \leq n, (v_i, v_j) \in E(G) \\
& \bar{d}_{i,j,s} \geq d_{i,j,s} - d_{i,j,s-1} && 1 \leq s \leq n, (v_i, v_j) \in E(G) \\
& a_{i,j,0} = 0 && (v_i, v_j) \in E(G) \\
& d_{i,j,0} = 0 && (v_i, v_j) \in E(G) \\
& w_{i,j,s} \geq \bar{a}_{i,j,s} + \bar{d}_{i,j,s} - (1 - x_{i,j}) \cdot 2e && 1 \leq s \leq n, (v_i, v_j) \in E(G) \\
& x_{i,j} \in \{0, 1\} && (v_i, v_j) \in E(G) \\
& y_{i,s} \in \{0, \dots, e\} && 1 \leq i \leq 2k - 1, 1 \leq s \leq n \\
& \bar{y}_{i,s} \in \{0, 1\} && 1 \leq i \leq 2k - 1, 1 \leq s \leq n \\
& z_{i,s,q} \in \{0, 1\} && 1 \leq i \leq 2k - 1, 1 \leq s \leq n, 0 \leq q \leq M \\
& a_{i,j,s}, d_{i,j,s} \in \{0, \dots, e\} && 1 \leq s \leq n, (v_i, v_j) \in E(G) \\
& \bar{a}_{i,j,s}, \bar{d}_{i,j,s} \in \{0, \dots, e\} && 1 \leq s \leq n, (v_i, v_j) \in E(G) \\
& w_{i,j,s} \in \{0, \dots, 2e\} && 1 \leq s \leq n, (v_i, v_j) \in E(G)
\end{aligned}$$

## Appendix D: Supplemental Results

We show in Fig. S1 average running times of the DP and ILP algorithms for simulated CN3 instances as a function of  $n$  and  $B$ . Fig. S1 shows violin plots of running time, tree distance and optimality gap for simulated CNT instances.

### Author details

<sup>1</sup>Department of Computer Science, Princeton University, Princeton, NJ 08540, USA. <sup>2</sup>Department of Computer Science, Center for Computational Molecular Biology, Brown University, Providence, RI 02912, USA. <sup>3</sup>School of Computer Science, Tel Aviv University, Tel Aviv, Israel. <sup>4</sup>Dipartimento di Informatica Sistemistica e Comunicazione (DISCo), Univ. degli Studi di Milano-Bicocca, Milan, Italy.

### References

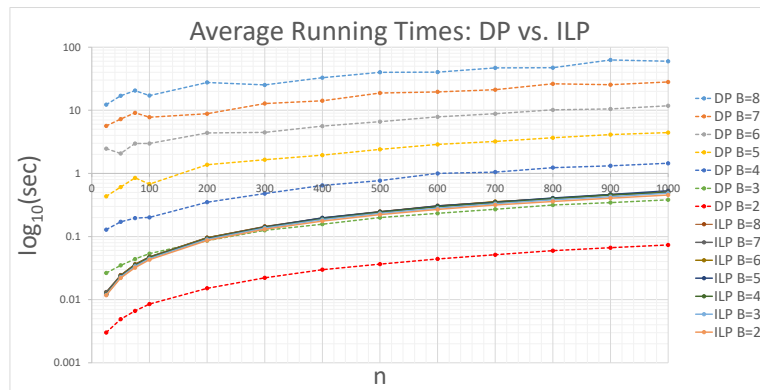

**Figure S1** Average running times of the DP and ILP algorithms for CN3 as a function of  $n$  and  $B$ . DP algorithms are represented by dashed lines while ILP algorithms are represented by straight lines. All algorithms were implemented in Python and the ILP was solved using GUROBI v6.0.5 ([www.gurobi.com](http://www.gurobi.com)). We ran the simulated instances on a server with 16 2.6 GHz CPUs and 128 GB of RAM.

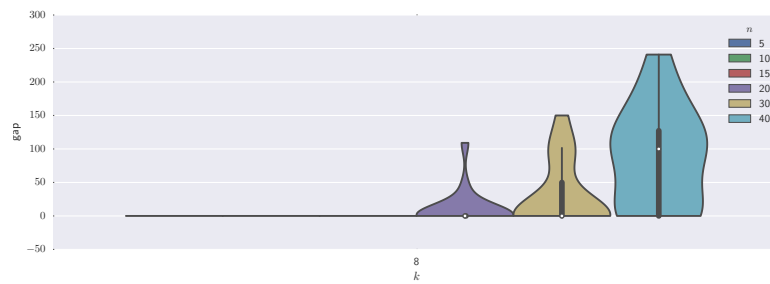

**Figure S2** Violin plot showing the optimality gap for varying number  $k$  of leaves and number  $n$  of positions. Median values are indicated by a white dot in each plot.

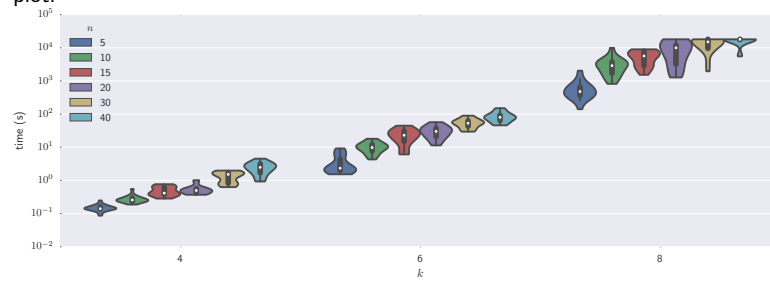

**Figure S3** Violin plot showing the running time in seconds (log scale) for varying number  $k$  of leaves and number  $n$  of positions. Median values are indicated by a white dot in each plot.

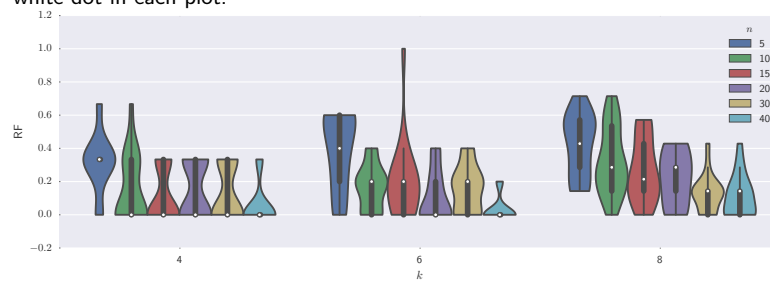

**Figure S4** Violin plot showing the normalized Robinson-Foulds (RF) metric for varying number  $k$  of leaves and number  $n$  of positions. Median values are indicated by a white dot in each plot.
